# Supplementary material for: A self-healing e-skin for quadruple-modal sensing
Source: Research Square preprint supplement (doi:10.21203/rs.3.rs-7503393/v1), 2025-09-23
Supplement: Supplementary file 1 [file b54282473101d42ee30c76fe.docx]

Supplementary Information for

**A** **self-healing e-skin for** **quadruple-modal sensing**

*Henghui Wang1, 4, Hao Xue1, 4, #, Yapeng Song1, Junjie Yuan1, Huijun Cao2, #, Quan Yuan3, Yichen Zhu1, Jonghwan Suhr3, #, Jintang Li1, Siwei Li1, #, Yingjie Guo1, Liyun Li1, Zhihao Zhang1, 3, #*

*1Department of Materials Science and Engineering, College of Materials, Xiamen University, Xiamen 361005, China.*

*2School of Transportation Engineering, Xiamen City University, Xiamen 361005, China.*

*3Department of Polymer Science and Engineering, School of Mechanical Engineering, Sungkyunkwan University, Suwon 16419, South Korea.*

*4These authors contributed equally: Henghui Wang, Hao Xue.*

*#E-mail: xuehao@xmu.edu.cn (Hao Xue), huijun@xmcu.edu.cn (Huijun Cao), suhr@skku.edu (Jonghwan Suhr), swli@xmu.edu.cn (Siwei Li), zhzhang@xmu.edu.cn (Zhihao Zhang).*

1. **Material characterization**


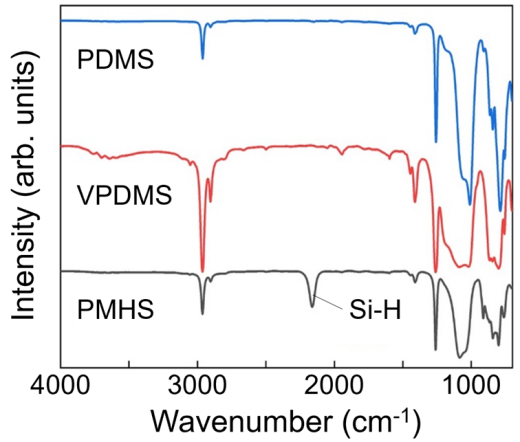


**Figure S1 FTIR spectra of PDMS and its synthesis precursors**


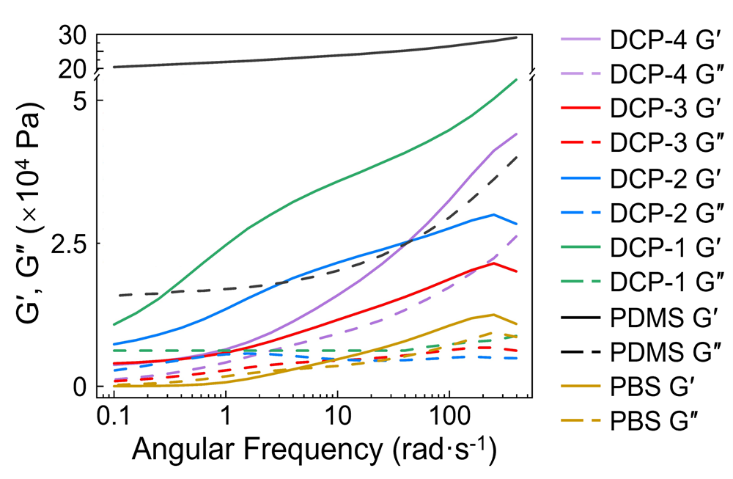


**Figure S2 Storage and loss moduli of different polymers**

**Table S1 Thermal transition and decomposition data of various polymers.**

| Type | Unit | PDMS | DCP-1 | DCP-2 | DCP-3 | DCP-4 | PBS |
| --- | --- | --- | --- | --- | --- | --- | --- |
| *T*g | ℃ | –118.4 | –119.4 | –122.2 | –122.9 | –124.1 | –125.6 |
| *T*m | ℃ | –39.9 | –40.9 | –42.2 | –40.5 | –40.1 | –44.3 |
| *T*d | ℃ | >250 | >250 | >250 | >250 | >250 | >250 |


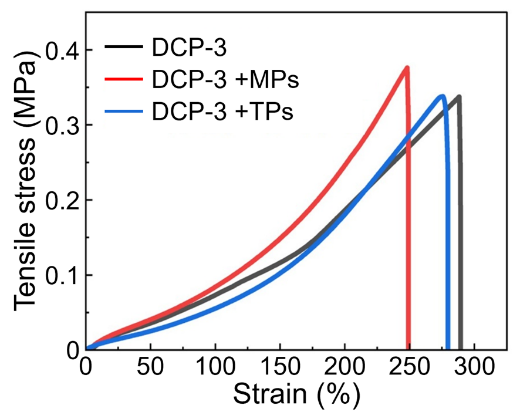


**Figure S3 Tensile mechanical response of DCP-3 before and after doping with functional particles.**

**
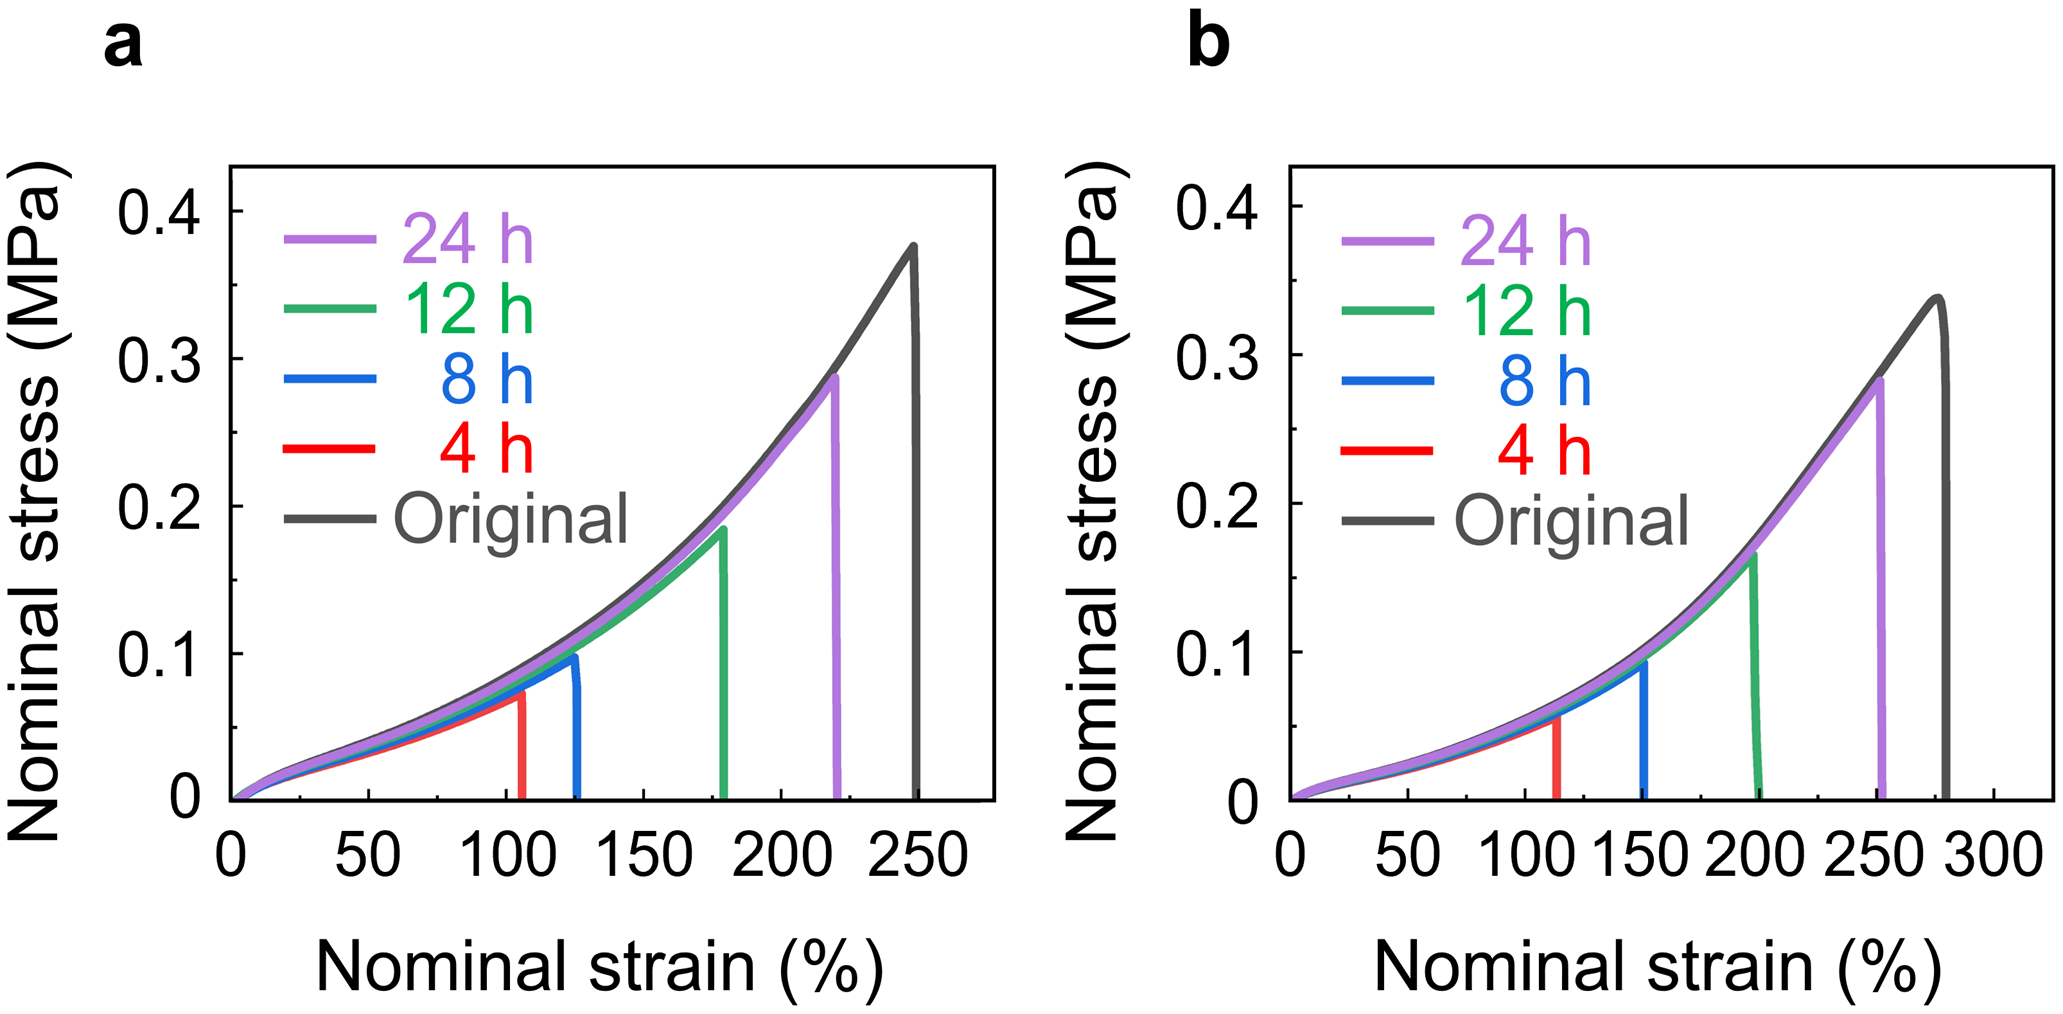
**

**Figure S4 Nominal stress-strain curves of self-healed composites.** (**a**) DCP-3 doped with MPs; (**b**) DCP-3 doped with TPs, both evaluated after various healing durations at 25 ℃. Note that the healing efficiency (*η*) was calculated as the ratio of the tensile strength of the healed sample to that of the original (unbroken) sample.


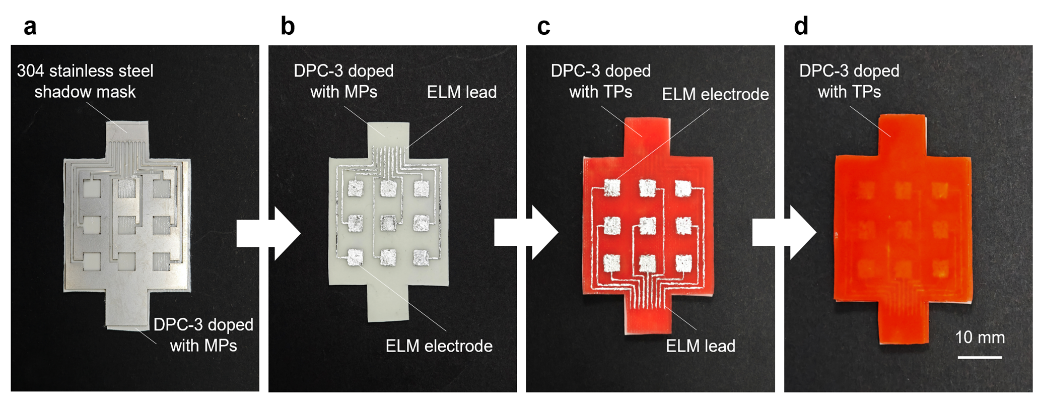


**Figure S5 Layer-by-layer assembly process of e-skin.** (**a**) Placing the shadow mask on the MP-doped DCP-3 layer (Layer 5) and performing UV/ozone treatment (**b**) Printing of the NP-doped ELM layer (Layer 4) onto the Layer 5; (**c**) Assembly of the TP-doped DCP-3 layer (Layer 3) onto Layer 5, followed by placing the shadow mask, performing UV/ozone treatment, andprinting of the NP-doped ELM layer (Layer 2) onto Layer 3; (**d**) Assembly of the TP-doped DCP-3 layer (Layer 1) onto Layer 3. After stacking, the assembled e-skin was vacuum-treated at 60 °C for 1 h to ensure structural integration, followed by UV/ozone treatment for 1 h to remove surface tackiness. The resulting e-skin has a total thickness of 1.5 mm, with each DCP-3 layer owning 0.5 mm in thickness.


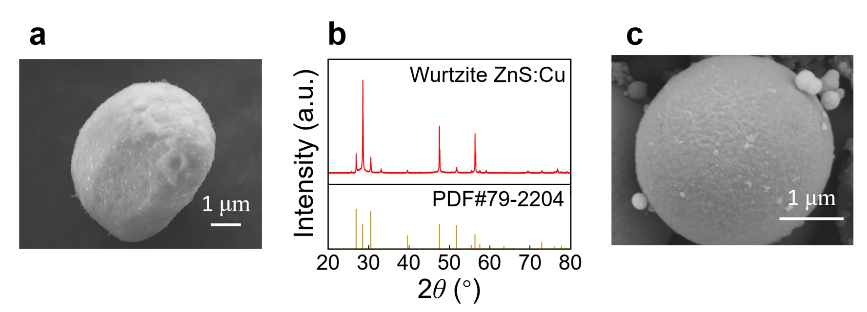


**Figure S6 Structural characteristics of functional particles.** (**a**) SEM image of a ZnS:Cu MP; (**b**) XRD pattern of ZnS:Cu MPs, consistent with the wurtzite phase (PDF#79-2204); (**c**) SEM image of a red TP.

1. **Simulation Analysis**

Finite element simulations were conducted using the commercial COMSOL Multiphysics software to investigate the interfacial mismatch and delamination between ZnS:Cu MPs and the DCP-3 matrix under large strain, and to analyze the resulting triboelectric phenomena, including contact electrification and electrostatic induction. A two-dimensional axisymmetric model was employed, in which the initial thickness and length of the DCP-3 matrix were set to 20 μm and 37.5 μm, respectively, and the diameter of the embedded spherical ZnS:Cu particle was set to 5 μm. A displacement boundary condition was applied on the top surface, with the bottom constrained by a roller support. Additionally, the measured material properties of DCP-3 included a specific heat capacity of 1.460 J·g–1·K–1, a density of 0.97 g·cm–3, a relative dielectric constant of 2.98, a thermal conductivity of 0.16 W·m–1·K–1, and a compressive modulus of 1.6 MPa. For other material parameters of ZnS:Cu and DCP-3, the default ZnS and PDMS datasets from the COMSOL material library were used, respectively.

As shown in Fig. S7, due to mechanical incompatibility, interfacial mismatch occurred between the particle and the polymer matrix under compressive strain along the thickness direction, leading to progressive delamination and air-gap formation. Based on different levels of compression strain, we quantified the delaminated area on the particle surface (*A*MP), the corresponding area on the polymer matrix (*A*DCP), and the maximum delamination-induced air-gap distance (*d*max), as listed in Table S2. According to the study by Jeong1, a fixed positive surface charge density of 10-4 C·m-2 was assigned to the ZnS:Cu MP at the delaminated interface. Assuming uniform charge distribution and applying charge conservation during triboelectrification, the surface charge density on the DCP-3 matrix (*σ*DCP) was calculated as *σ*DCP=*σ*MP·*A*MP/*A*DCP*.* The *σ*DCP calculated in Table S2 was assigned to the delaminated region of the DCP-3 matrix. A surrounding infinite element domain with dimensions of 450 × 225 μm2 was established, and its boundary potential was set to 0 V. The resulting electric potential and field distributions are shown in Fig. 6b.


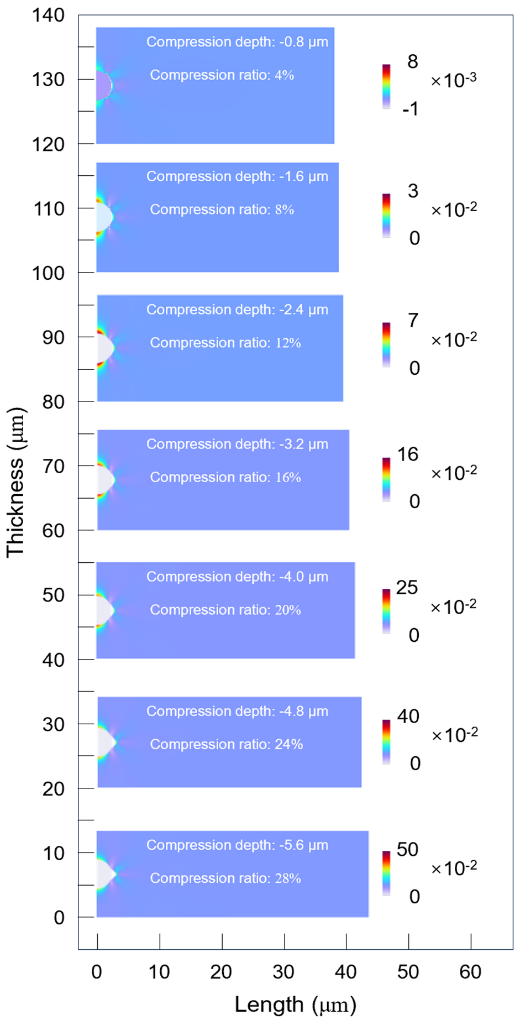


**Figure S7 Volumetric strain of DCP-3 doped with one** **ZnS:Cu particle under different compressive depths along the thickness direction.**

**Table S2 Thermal transition and decomposition data of various polymers.** Note that, *d*c is the compressive depth, *ε*c is the compressive strain, *A*MP is the delaminated area on the particle surface, *A*DCP is the delaminated area on the polymer matrix, and *d*max is the maximum delamination-induced air-gap distance, and *σ*DCP is surface charge density on the DCP-3 matrix.

| *d*c | *ε*c | *A*MP | *A*DCP | *d*max | *σ*DCP |
| --- | --- | --- | --- | --- | --- |
| (μm) | (%) | (μm2) | (μm2) | (μm) | C·m-2 |
| 0.8 | 4 | 53.846 | 56.88 | 0.10573 | –0.947 |
| 1.6 | 8 | 46.453 | 50.646 | 0.16445 | –0.917 |
| 2.4 | 12 | 42.969 | 48.642 | 0.23313 | –0.883 |
| 3.2 | 16 | 39.803 | 47.156 | 0.31029 | –0.844 |
| 4.0 | 20 | 36.915 | 46.247 | 0.39969 | –0.798 |
| 4.8 | 24 | 34.112 | 45.893 | 0.50664 | –0.743 |
| 5.6 | 28 | 31.108 | 46.239 | 0.64439 | –0.673 |


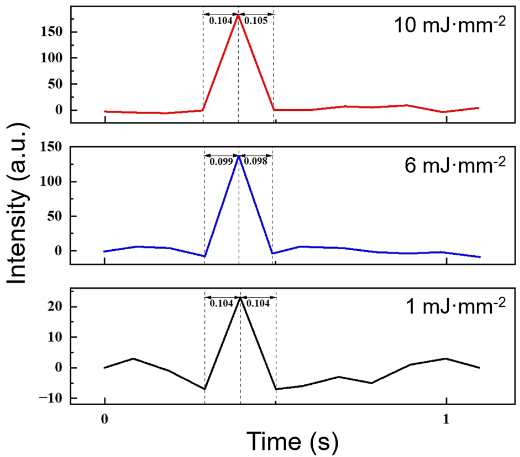


**Figure S8 Response time of the mechanoluminescent emission spectrum.**

1. **Formula Derivation**

To model transient heat conduction in a DCP-3 film with a thickness of *w*, we consider the one-dimensional heat diffusion equation:

, (1)

where *T*(*x*, *t*) is the temperature at position x∈[0, *w*] and time *t*, and *α* is the thermal diffusivity of the DCP-3.

1. Boundary and initial conditions:

Left boundary (in contact with a heat source at constant temperature):

for t > 0. (2)

Right boundary (adiabatic interface with air layer):

for t > 0. (3)

Initial condition (uniform ambient temperature):

for 0≤*x*≤*w*. (4)

1. Approximate Analytical Solution:

Note that *w* =1 mm, *α =* 0.11 mm2·s-1 for DCP-3 at room temperature. For short times *t* ≪*w2/α*(*≈* 9.09 s), the thermal wave has not yet reached the adiabatic boundary at *x* = *w*, and the system can be approximated by a semi-infinite solid with a constant-temperature boundary at *x* = 0. In this regime, the analytical solution is given by：

, (5)

where erf(·) is the error function, defined as:

. (6)

Assuming the colour-change threshold occurs at temperature *T*0, we define the colour front depth as *x*0(*t*), so that:

. (7)

Substituting gives:

. (8)

Rewriting:

. (9)

Now, since the colour front depth *x*0(*t*) is related to the normalized intensity of absorption spectra *I*(*t*) (0 ≤ *I*(*t*) ≤ 1) by:

. (10)

Substitute into the precious result:

. (11)

Note that erfc(*z*)=1-erf(*z*) and we have

. (12)

For early times (or shallow colour-change depth), we define the small parameter:

≪1. (13)

Using the Taylor expansion of the complementary error function for small *z*:

. (14)

Retaining only the first-order term:

. (15)

Substituting into the inverse equation and performing a first-order expansion:

. (16)

Rewriting:

, (17)

. (18)

1. **Supporting Video**

Video S1. Real-time sensing signals of the e-skin during fist clenching.

Video S2. Real-time sensing signals of the e-skin during swallowing.

Video S3. Real-time tactile signal response of the e-skin during human-machine interaction.

Video S4. Real-time tactile signal response of the e-skin as a wearable device on the human body.

Video S5. Real-time spectral response of the e-skin’s mechanoluminescent layer under impact excitation.

Video S6. Real-time spectral response of the e-skin’s thermochromic layer under contact heating.

**References**

1 Jeong, H. I. *et al.* Super elastic and negative triboelectric polymer matrix for high performance mechanoluminescent platforms. *Nat. Commun.* **16**, 854 (2025).
